# Supplementary material for: Phospholipid and LC-PUFA metabolism in Atlantic salmon (Salmo salar) testes during sexual maturation
Source: PubMed Central journal article supplement (PMC7259613; doi:10.1371/journal.pone.0233322), 2020-05-29
Supplement: pone.0233322.s001.pdf [file pone.0233322.s001.pdf]

**S1 Table. Fatty acids (FA) and phospholipids (PL) in gonads of immature females (IMF; n=4), immature males (IMM; n=6) and maturing males (MM-1, n=8; MM-2, n=6) Atlantic salmon.**

| FA and PL            | (mg/g gonad)             |                          |                          |                          | (mg/kg BW)              |                         |                          |                          | (mg/g total FA)           |                          |                          |                           |
|----------------------|--------------------------|--------------------------|--------------------------|--------------------------|-------------------------|-------------------------|--------------------------|--------------------------|---------------------------|--------------------------|--------------------------|---------------------------|
|                      | IMF                      | IMM                      | MM-1                     | MM-2                     | IMF                     | IMM                     | MM-1                     | MM-2                     | IMF                       | IMM                      | MM-1                     | MM-2                      |
| PC                   | 3.17 <sup>a</sup>        | 2.46 <sup>a</sup>        | 2.03 <sup>a</sup>        | 2.46 <sup>a</sup>        | 3.1 <sup>a</sup>        | 1.5 <sup>a</sup>        | 61.7 <sup>b</sup>        | 150.6 <sup>c</sup>       | 7.60 <sup>ab</sup>        | 4.53 <sup>a</sup>        | 14.28 <sup>bc</sup>      | 20.31 <sup>c</sup>        |
| PE                   | 3.50 <sup>a</sup>        | 4.63 <sup>a</sup>        | 2.94 <sup>a</sup>        | 3.01 <sup>a</sup>        | 3.4 <sup>a</sup>        | 2.6 <sup>a</sup>        | 91.8 <sup>b</sup>        | 180.8 <sup>b</sup>       | 8.02 <sup>a</sup>         | 8.54 <sup>a</sup>        | 20.28 <sup>a</sup>       | 24.38 <sup>a</sup>        |
| <b>PI+PA</b>         | <b>0.83<sup>a</sup></b>  | <b>1.27<sup>ab</sup></b> | <b>1.76<sup>b</sup></b>  | <b>1.81<sup>ab</sup></b> | <b>0.6<sup>a</sup></b>  | <b>0.8<sup>a</sup></b>  | <b>53.5<sup>b</sup></b>  | <b>118.3<sup>b</sup></b> | <b>1.57<sup>a</sup></b>   | <b>2.27<sup>a</sup></b>  | <b>12.86<sup>b</sup></b> | <b>15.71<sup>b</sup></b>  |
| PS                   | 0.39 <sup>ab</sup>       | 0.52 <sup>b</sup>        | 0.34 <sup>a</sup>        | 0.31 <sup>a</sup>        | 0.4 <sup>a</sup>        | 0.3 <sup>a</sup>        | 10.6 <sup>b</sup>        | 19.5 <sup>c</sup>        | 0.76 <sup>a</sup>         | 1.01 <sup>a</sup>        | 2.47 <sup>b</sup>        | 2.65 <sup>b</sup>         |
| Sum PL               | 7.40 <sup>a</sup>        | 8.89 <sup>a</sup>        | 7.07 <sup>a</sup>        | 7.60 <sup>a</sup>        | 7.5 <sup>a</sup>        | 5.2 <sup>a</sup>        | 217.7 <sup>b</sup>       | 469.2 <sup>c</sup>       | 16.06 <sup>a</sup>        | 16.36 <sup>a</sup>       | 49.90 <sup>b</sup>       | 63.05 <sup>b</sup>        |
| 14:0                 | 1.45 <sup>b</sup>        | 1.09 <sup>b</sup>        | 0.16 <sup>a</sup>        | 0.12 <sup>a</sup>        | 1.8 <sup>a</sup>        | 0.7 <sup>a</sup>        | 4.7 <sup>b</sup>         | 7.7 <sup>b</sup>         | 2.28 <sup>b</sup>         | 1.78 <sup>b</sup>        | 1.15 <sup>a</sup>        | 1.04 <sup>a</sup>         |
| <b>16:0</b>          | <b>7.17<sup>b</sup></b>  | <b>6.12<sup>b</sup></b>  | <b>2.18<sup>a</sup></b>  | <b>2.06<sup>a</sup></b>  | <b>8.3<sup>a</sup></b>  | <b>3.9<sup>a</sup></b>  | <b>66.7<sup>b</sup></b>  | <b>129.2<sup>c</sup></b> | <b>12.44<sup>a</sup></b>  | <b>10.42<sup>a</sup></b> | <b>15.69<sup>b</sup></b> | <b>17.42<sup>b</sup></b>  |
| 18:0                 | 1.52 <sup>b</sup>        | 1.90 <sup>b</sup>        | 0.53 <sup>a</sup>        | 0.49 <sup>a</sup>        | 1.7 <sup>a</sup>        | 1.2 <sup>a</sup>        | 16.4 <sup>b</sup>        | 30.4 <sup>c</sup>        | 2.67 <sup>a</sup>         | 3.28 <sup>ab</sup>       | 3.86 <sup>bc</sup>       | 4.11 <sup>c</sup>         |
| 16:1n-7              | 1.41 <sup>b</sup>        | 1.07 <sup>b</sup>        | 0.11 <sup>a</sup>        | 0.09 <sup>a</sup>        | 1.7 <sup>a</sup>        | 0.7 <sup>ab</sup>       | 3.1 <sup>bc</sup>        | 5.2 <sup>c</sup>         | 2.32 <sup>b</sup>         | 1.75 <sup>b</sup>        | 0.79 <sup>a</sup>        | 0.70 <sup>a</sup>         |
| 18:1n-9              | 18.21 <sup>b</sup>       | 22.67 <sup>b</sup>       | 2.77 <sup>a</sup>        | 2.15 <sup>a</sup>        | 20.3 <sup>a</sup>       | 14.7 <sup>a</sup>       | 80.3 <sup>b</sup>        | 131.9 <sup>b</sup>       | 33.06 <sup>b</sup>        | 37.07 <sup>b</sup>       | 19.51 <sup>a</sup>       | 17.90 <sup>a</sup>        |
| 20:1n-9              | 1.75 <sup>b</sup>        | 2.19 <sup>b</sup>        | 0.23 <sup>a</sup>        | 0.17 <sup>a</sup>        | 2.0 <sup>a</sup>        | 1.4 <sup>a</sup>        | 6.8 <sup>b</sup>         | 10.6 <sup>b</sup>        | 3.04 <sup>b</sup>         | 3.56 <sup>b</sup>        | 1.64 <sup>a</sup>        | 1.44 <sup>a</sup>         |
| 18:2n-6              | 4.89 <sup>b</sup>        | 7.67 <sup>b</sup>        | 1.31 <sup>a</sup>        | 0.91 <sup>a</sup>        | 5.1 <sup>a</sup>        | 5.0 <sup>a</sup>        | 35.9 <sup>b</sup>        | 55.8 <sup>b</sup>        | 9.66 <sup>ab</sup>        | 12.50 <sup>b</sup>       | 9.03 <sup>a</sup>        | 7.58 <sup>a</sup>         |
| 20:3n-6              | 0.14 <sup>b</sup>        | 0.20 <sup>b</sup>        | 0.08 <sup>a</sup>        | 0.05 <sup>a</sup>        | 0.1 <sup>a</sup>        | 0.1 <sup>a</sup>        | 2.2 <sup>b</sup>         | 3.2 <sup>b</sup>         | 0.41 <sup>ab</sup>        | 0.35 <sup>a</sup>        | 0.55 <sup>b</sup>        | 0.44 <sup>ab</sup>        |
| <b>20:4n-6 (ARA)</b> | <b>0.55<sup>b</sup></b>  | <b>0.55<sup>b</sup></b>  | <b>0.31<sup>a</sup></b>  | <b>0.24<sup>a</sup></b>  | <b>0.6<sup>b</sup></b>  | <b>0.3<sup>a</sup></b>  | <b>8.7<sup>c</sup></b>   | <b>15.2<sup>d</sup></b>  | <b>1.10<sup>a</sup></b>   | <b>1.03<sup>a</sup></b>  | <b>2.12<sup>b</sup></b>  | <b>2.04<sup>b</sup></b>   |
| 18:3n-3              | 1.82 <sup>b</sup>        | 2.77 <sup>b</sup>        | 0.34 <sup>a</sup>        | 0.25 <sup>a</sup>        | 1.9 <sup>a</sup>        | 1.8 <sup>a</sup>        | 9.8 <sup>b</sup>         | 15.3 <sup>b</sup>        | 3.61 <sup>bc</sup>        | 4.47 <sup>c</sup>        | 2.43 <sup>ab</sup>       | 2.08 <sup>a</sup>         |
| <b>20:5n-3 (EPA)</b> | <b>2.45<sup>c</sup></b>  | <b>2.06<sup>bc</sup></b> | <b>1.09<sup>a</sup></b>  | <b>1.27<sup>ab</sup></b> | <b>2.6<sup>a</sup></b>  | <b>1.3<sup>a</sup></b>  | <b>35.6<sup>b</sup></b>  | <b>79.8<sup>c</sup></b>  | <b>4.91<sup>ab</sup></b>  | <b>3.65<sup>a</sup></b>  | <b>8.04<sup>bc</sup></b> | <b>10.72<sup>c</sup></b>  |
| 22:5n-3              | 0.65 <sup>b</sup>        | 0.66 <sup>b</sup>        | 0.22 <sup>a</sup>        | 0.18 <sup>a</sup>        | 0.7 <sup>b</sup>        | 0.4 <sup>a</sup>        | 6.2 <sup>c</sup>         | 11.3 <sup>d</sup>        | 1.29 <sup>ab</sup>        | 1.13 <sup>a</sup>        | 1.52 <sup>b</sup>        | 1.53 <sup>b</sup>         |
| <b>22:6n-3 (DHA)</b> | <b>5.43<sup>c</sup></b>  | <b>3.65<sup>b</sup></b>  | <b>2.45<sup>a</sup></b>  | <b>2.26<sup>a</sup></b>  | <b>5.7<sup>b</sup></b>  | <b>2.3<sup>a</sup></b>  | <b>75.3<sup>c</sup></b>  | <b>141.7<sup>d</sup></b> | <b>10.92<sup>b</sup></b>  | <b>6.51<sup>a</sup></b>  | <b>17.61<sup>c</sup></b> | <b>19.14<sup>c</sup></b>  |
| Sum SFA              | 10.74 <sup>b</sup>       | 9.60 <sup>b</sup>        | 2.99 <sup>a</sup>        | 2.75 <sup>a</sup>        | 12.5 <sup>a</sup>       | 6.1 <sup>a</sup>        | 91.3 <sup>b</sup>        | 171.8 <sup>c</sup>       | 18.38 <sup>ab</sup>       | 16.30 <sup>a</sup>       | 21.53 <sup>bc</sup>      | 23.18 <sup>c</sup>        |
| Sum MUFA             | 26.08 <sup>b</sup>       | 31.01 <sup>b</sup>       | 3.19 <sup>a</sup>        | 4.15 <sup>a</sup>        | 29.4 <sup>a</sup>       | 20.1 <sup>a</sup>       | 118.5 <sup>b</sup>       | 196.0 <sup>b</sup>       | 46.64 <sup>b</sup>        | 50.73 <sup>b</sup>       | 29.06 <sup>a</sup>       | 26.56 <sup>a</sup>        |
| Sum n-6 PUFA         | 5.95 <sup>b</sup>        | 9.05 <sup>b</sup>        | 1.94 <sup>a</sup>        | 1.38 <sup>a</sup>        | 6.2 <sup>a</sup>        | 5.8 <sup>a</sup>        | 53.3 <sup>b</sup>        | 84.8 <sup>b</sup>        | 11.79 <sup>a</sup>        | 14.94 <sup>a</sup>       | 13.35 <sup>a</sup>       | 11.50 <sup>a</sup>        |
| Sum n-3 PUFA         | 10.85 <sup>b</sup>       | 9.77 <sup>b</sup>        | 4.27 <sup>a</sup>        | 4.05 <sup>a</sup>        | 11.4 <sup>a</sup>       | 6.2 <sup>a</sup>        | 131.5 <sup>b</sup>       | 253.5 <sup>c</sup>       | 21.68 <sup>a</sup>        | 16.88 <sup>a</sup>       | 30.78 <sup>b</sup>       | 34.19 <sup>b</sup>        |
| <b>Sum FA</b>        | <b>54.55<sup>b</sup></b> | <b>60.10<sup>b</sup></b> | <b>14.21<sup>a</sup></b> | <b>11.92<sup>a</sup></b> | <b>60.7<sup>a</sup></b> | <b>38.6<sup>a</sup></b> | <b>414.3<sup>b</sup></b> | <b>739.9<sup>c</sup></b> | <b>98.49<sup>ab</sup></b> | <b>98.86<sup>b</sup></b> | <b>94.71<sup>a</sup></b> | <b>95.43<sup>ab</sup></b> |

IMF=immature females; IMM=immature males; MM-1/-2= maturing males (1. GSI<5 and 2. GSI>5). Mean-values. Statistical analysis by 1-way ANOVA, followed by Tukey post hoc test were different letters denote significant differences (P<0.05) among groups.
