# Supplementary material for: Phospholipid and LC-PUFA metabolism in Atlantic salmon (Salmo salar) testes during sexual maturation
Source: PubMed Central journal article supplement (PMC7259613; doi:10.1371/journal.pone.0233322), 2020-05-29
Supplement: pone.0233322.s002.pdf [file pone.0233322.s002.pdf]

**Table S2. Gonadal mRNA levels of selected genes in immature females (IMF; n=4), immature males (IMM; n=6) and maturing males (MM-1, n=8; MM-2, n=6) Atlantic salmon.**

| Genes                        | mRNA uncorrected <sup>1b</sup> |                         |                          |                          | mRNA corrected <sup>1c</sup> |                         |                           |                            |
|------------------------------|--------------------------------|-------------------------|--------------------------|--------------------------|------------------------------|-------------------------|---------------------------|----------------------------|
|                              | IMF                            | IMM                     | MM-1                     | MM-2                     | IMF                          | IMM                     | MM-1                      | MM-2                       |
| <i>star</i>                  | 0.01 <sup>a</sup>              | 1.00 <sup>c</sup>       | 0.13 <sup>b</sup>        | 0.13 <sup>bc</sup>       | 0.01 <sup>a</sup>            | 1.00 <sup>b</sup>       | 3.24 <sup>bc</sup>        | 6.97 <sup>c</sup>          |
| <i>hsd3b</i>                 | 1.03 <sup>b</sup>              | 1.00 <sup>b</sup>       | 0.19 <sup>a</sup>        | 0.11 <sup>a</sup>        | 1.39 <sup>ab</sup>           | 1.00 <sup>a</sup>       | 4.80 <sup>ab</sup>        | 5.70 <sup>b</sup>          |
| <i>hsd11b</i>                | 0.20 <sup>a</sup>              | 1.00 <sup>b</sup>       | 0.21 <sup>a</sup>        | 0.15 <sup>a</sup>        | 0.27 <sup>a</sup>            | 1.00 <sup>a</sup>       | 4.96 <sup>b</sup>         | 7.31 <sup>b</sup>          |
| <i>cyp11a (p450scc)</i>      | 0.09 <sup>a</sup>              | 1.00 <sup>b</sup>       | 0.19 <sup>a</sup>        | 0.16 <sup>a</sup>        | 0.12 <sup>a</sup>            | 1.00 <sup>b</sup>       | 4.88 <sup>c</sup>         | 8.89 <sup>c</sup>          |
| <i>cyp11b (p450c11)</i>      | 0.23 <sup>b</sup>              | 1.00 <sup>c</sup>       | 0.12 <sup>a</sup>        | 0.08 <sup>a</sup>        | 0.31 <sup>a</sup>            | 1.00 <sup>ab</sup>      | 3.23 <sup>bc</sup>        | 4.65 <sup>c</sup>          |
| <i>cyp17a (p450c17)</i>      | 0.32 <sup>ab</sup>             | 1.00 <sup>b</sup>       | 0.15 <sup>a</sup>        | 0.18 <sup>a</sup>        | 0.41 <sup>a</sup>            | 1.00 <sup>ab</sup>      | 4.23 <sup>b</sup>         | 11.40 <sup>c</sup>         |
| <i>amh</i>                   | 0.33 <sup>b</sup>              | 1.00 <sup>b</sup>       | 0.01 <sup>a</sup>        | 0.01 <sup>a</sup>        | 0.45 <sup>ab</sup>           | 1.00 <sup>b</sup>       | 0.28 <sup>a</sup>         | 0.49 <sup>ab</sup>         |
| <i>acsl4</i>                 | 8.90 <sup>c</sup>              | 1.00 <sup>a</sup>       | 4.01 <sup>b</sup>        | 3.46 <sup>b</sup>        | 12.38 <sup>b</sup>           | 1.00 <sup>a</sup>       | 113.83 <sup>c</sup>       | 168.12 <sup>c</sup>        |
| <i>acot2</i>                 | <b>2.92<sup>b</sup></b>        | <b>1.00<sup>a</sup></b> | <b>0.98<sup>a</sup></b>  | <b>1.42<sup>ab</sup></b> | <b>3.94<sup>b</sup></b>      | <b>1.00<sup>a</sup></b> | <b>22.97<sup>c</sup></b>  | <b>76.49<sup>d</sup></b>   |
| <i>lpl</i>                   | <b>26.33<sup>b</sup></b>       | <b>1.00<sup>a</sup></b> | <b>17.07<sup>b</sup></b> | <b>21.89<sup>b</sup></b> | <b>35.71<sup>b</sup></b>     | <b>1.00<sup>a</sup></b> | <b>496.56<sup>c</sup></b> | <b>1155.72<sup>c</sup></b> |
| <i>lipc (hsl)</i>            | 7.26 <sup>b</sup>              | 1.00 <sup>a</sup>       | 0.59 <sup>a</sup>        | 0.61 <sup>a</sup>        | 9.38 <sup>b</sup>            | 1.00 <sup>a</sup>       | 14.03 <sup>b</sup>        | 30.25 <sup>b</sup>         |
| <i>cd36</i>                  | 3.56 <sup>c</sup>              | 1.00 <sup>b</sup>       | 0.52 <sup>a</sup>        | 0.55 <sup>ab</sup>       | 4.68 <sup>b</sup>            | 1.00 <sup>a</sup>       | 13.89 <sup>bc</sup>       | 30.97 <sup>c</sup>         |
| <i>fatp</i>                  | 29.78 <sup>c</sup>             | 1.00 <sup>b</sup>       | 0.26 <sup>a</sup>        | 0.14 <sup>a</sup>        | 38.53 <sup>c</sup>           | 1.00 <sup>a</sup>       | 6.40 <sup>b</sup>         | 7.08 <sup>b</sup>          |
| <i>fabp11</i>                | 0.65 <sup>b</sup>              | 1.00 <sup>b</sup>       | 0.26 <sup>a</sup>        | 0.30 <sup>a</sup>        | 0.88 <sup>a</sup>            | 1.00 <sup>a</sup>       | 6.53 <sup>b</sup>         | 13.13 <sup>b</sup>         |
| <i>fads1 (Δ5 desaturase)</i> | 0.52 <sup>ab</sup>             | 1.00 <sup>b</sup>       | 0.36 <sup>a</sup>        | 0.26 <sup>a</sup>        | 0.71 <sup>a</sup>            | 1.00 <sup>a</sup>       | 8.80 <sup>b</sup>         | 14.84 <sup>b</sup>         |
| <i>fads2 (Δ6 desaturase)</i> | 0.57 <sup>ab</sup>             | 1.00 <sup>b</sup>       | 0.39 <sup>a</sup>        | 0.33 <sup>a</sup>        | 0.79 <sup>a</sup>            | 1.00 <sup>a</sup>       | 10.41 <sup>b</sup>        | 18.52 <sup>b</sup>         |
| <i>elovl2</i>                | <b>0.20<sup>a</sup></b>        | <b>1.00<sup>b</sup></b> | <b>1.67<sup>b</sup></b>  | <b>4.07<sup>b</sup></b>  | <b>0.25<sup>a</sup></b>      | <b>1.00<sup>a</sup></b> | <b>44.51<sup>b</sup></b>  | <b>225.91<sup>c</sup></b>  |
| <i>elovl5a</i>               | 24.24 <sup>c</sup>             | 1.00 <sup>b</sup>       | 0.56 <sup>a</sup>        | 0.54 <sup>ab</sup>       | 31.84 <sup>b</sup>           | 1.00 <sup>a</sup>       | 14.71 <sup>b</sup>        | 23.85 <sup>b</sup>         |
| <i>elovl5b</i>               | 18.11 <sup>c</sup>             | 1.00 <sup>b</sup>       | 0.29 <sup>a</sup>        | 0.44 <sup>ab</sup>       | 24.22 <sup>c</sup>           | 1.00 <sup>a</sup>       | 7.26 <sup>b</sup>         | 12.55 <sup>bc</sup>        |
| <i>fasn (fas)</i>            | 45.00 <sup>b</sup>             | 1.00 <sup>a</sup>       | 1.31 <sup>a</sup>        | 1.35 <sup>a</sup>        | 60.96 <sup>b</sup>           | 1.00 <sup>a</sup>       | 36.70 <sup>b</sup>        | 63.83 <sup>b</sup>         |
| <i>chpt1</i>                 | 17.04 <sup>c</sup>             | 1.00 <sup>b</sup>       | 0.22 <sup>a</sup>        | 0.22 <sup>a</sup>        | 22.66 <sup>c</sup>           | 1.00 <sup>a</sup>       | 5.18 <sup>b</sup>         | 9.90 <sup>bc</sup>         |
| <i>cept1</i>                 | 10.89 <sup>b</sup>             | 1.00 <sup>a</sup>       | 0.65 <sup>a</sup>        | 0.59 <sup>a</sup>        | 14.08 <sup>b</sup>           | 1.00 <sup>a</sup>       | 17.37 <sup>b</sup>        | 29.35 <sup>b</sup>         |
| <i>apoa1</i>                 | 0.24 <sup>a</sup>              | 1.00 <sup>a</sup>       | 0.98 <sup>a</sup>        | 3.14 <sup>a</sup>        | 0.37 <sup>a</sup>            | 1.00 <sup>a</sup>       | 31.85 <sup>b</sup>        | 110.88 <sup>c</sup>        |
| <i>apob</i>                  | 57.14 <sup>b</sup>             | 1.00 <sup>a</sup>       | 0.72 <sup>a</sup>        | 2.28 <sup>a</sup>        | 85.24 <sup>c</sup>           | 1.00 <sup>a</sup>       | 23.38 <sup>b</sup>        | 74.24 <sup>c</sup>         |

<sup>1</sup> Mean qPCR quantity after normalization to *18s* (b) and correction to gonad mass/body weight (c), mean values for immature males set to 1.0 for both calculations. IMF=immature females; IMM=immature males; MM-1/-2= maturing males (1. GSI<5 and 2. GSI>5). Statistical analysis by 1-way ANOVA, followed by Tukey post hoc test were different letters denote significant differences (P<0.05) among groups.
